# Supplementary material
Source: HighWire-hosted journal article supplement (http://cmaj.ca/highwire/filestream/150620/field_highwire_adjunct_files/0/231019-res-1-at.pdf)
Supplement: 231019-res-1-at.pdf [file 231019-res-1-at.pdf]

## Supplement 1: Objectives and Timeline of the overarching *Understanding and Defining Quality of Care in the Emergency Department with First Nations Members in Alberta Study*

### Objectives

1. To examine quantitative differences in ED visit characteristics and quality of care indicators between FN members and non-FN persons in Alberta.
2. To explore FN ED experiences of seeking and receiving care, racism and reconciliation, and healing, from FN patient and ED clinician perspectives.
3. To produce FN definitions of quality of care in the ED, and bring FN perspectives into dialogue with Western understandings of quality of care.

### Timeline

| Timing                                                                | Activity                                                                                                                                                                                                                                                                                                                                                                                                                                                               |
|-----------------------------------------------------------------------|------------------------------------------------------------------------------------------------------------------------------------------------------------------------------------------------------------------------------------------------------------------------------------------------------------------------------------------------------------------------------------------------------------------------------------------------------------------------|
| December 2016-March 2017                                              | First Project Discussions with AFNIGC                                                                                                                                                                                                                                                                                                                                                                                                                                  |
| April 2017-Present                                                    | Monthly to Quarterly Steering Committee Meetings                                                                                                                                                                                                                                                                                                                                                                                                                       |
| Fall 2017 to Present                                                  | Presentations for Building Support for the Project and Knowledge Translation – including to the Assembly of Treaty Chiefs (Alberta), Indigenous healthcare and educational institutions, Alberta Health Services (including to leadership of all 5 zones and Clinical Operations Executive Committee), Canadian Association of Emergency Physicians National Grand Rounds, University emergency medicine rounds, AFNIGC Annual General Meetings, Academic Conferences. |
| February 2018                                                         | Provincial Engagement meeting to propose study to broad stakeholders (funding from Maskwacis Health Services, AFNIGC, AHS)                                                                                                                                                                                                                                                                                                                                             |
| March 2018                                                            | CIHR Grant Funds Received                                                                                                                                                                                                                                                                                                                                                                                                                                              |
| February 2019                                                         | Administrative Data Received and Statistical Analysis Begun                                                                                                                                                                                                                                                                                                                                                                                                            |
| Fall 2019                                                             | Qualitative Provider and Health Director Interviews/Focus Groups begun                                                                                                                                                                                                                                                                                                                                                                                                 |
| June 2019, October 2019, February 2021, September 2022, February 2024 | Elder Meetings for Planning and Co-Interpretation                                                                                                                                                                                                                                                                                                                                                                                                                      |
| October 2020, July 2021, April 2022                                   | Sharing Circles for Qualitative Data Collection (one per Treaty area)                                                                                                                                                                                                                                                                                                                                                                                                  |
| June 2021                                                             | Published Descriptive Statistics in BMC Health Services Research                                                                                                                                                                                                                                                                                                                                                                                                       |
| January 2022                                                          | Triage Analysis Published in CMAJ                                                                                                                                                                                                                                                                                                                                                                                                                                      |
| June 2022                                                             | Published Results of Provider Interviews in BMC Health Services Research                                                                                                                                                                                                                                                                                                                                                                                               |
| June 2023                                                             | First Presentations of First Nations' Understanding of Quality of Care Definition Draft to Stakeholder Groups                                                                                                                                                                                                                                                                                                                                                          |
| Planned Publication                                                   | In-depth Qualitative Analysis of Sharing Circle and Health Director Interview/Focus Group Data                                                                                                                                                                                                                                                                                                                                                                         |
| Planned Publication                                                   | Female Sex-Specific Descriptive Analyses                                                                                                                                                                                                                                                                                                                                                                                                                               |
| Planned Publication                                                   | A First Nations Definition of Quality Emergency Care                                                                                                                                                                                                                                                                                                                                                                                                                   |

Appendix 1, as submitted by the authors. Appendix to: McLane P, Bill L, Healy B, et al. Leaving emergency departments without completing treatment among First Nations and non-First Nations patients in Alberta: a mixed-methods study. *CMAJ* 2024. doi: 10.1503/cmaj.231019.

Copyright © 2024 The Author(s) or their employer(s). To receive this resource in an accessible format, please contact us at [cmajgroup@cmaj.ca](mailto:cmajgroup@cmaj.ca).

## Supplement 2: Categorization of hospitals by a combination of geography and facility type.

The Large Metro category includes tertiary and regional hospitals in Edmonton and Calgary. Small Metro includes Edmonton and Calgary free standing EDs (no inpatient capacity), ambulatory care and urgent care. Only the cities proper were included in the Metro categories, while contiguous urban communities (e.g. Leduc, Airdrie) were included in the Large Community or Small Facilities Outside Metro categories, depending on their size. Our “Regional Outside Metro” category includes the five regional hospitals outside Edmonton and Calgary (Fort McMurray, Lethbridge, Grande Prairie, Red Deer, Medicine Hat). Large Community is a pre-existing AHS category defined as hospitals that offer ED, surgery, obstetrics, etc. but have less than 5000 inpatients per year. These are all outside Edmonton and Calgary. Small Facilities Outside Metro includes community hospitals that offer fewer services than large community hospitals, and generally have fewer inpatient admissions, as well as suburban and rural ambulatory care and urgent care facilities.

## Supplement 3: Hospitals by Type by Alberta Health Services Zone

| Row Labels                     | Calgary   | Central   | Edmonton  | North     | South     | Row Totals |
|--------------------------------|-----------|-----------|-----------|-----------|-----------|------------|
| Large Metro                    | 5         | 0         | 6         | 0         | 0         | 11         |
| Small Metro                    | 2         | 0         | 2         | 0         | 0         | 4          |
| Regional Outside Metro         | 0         | 1         | 0         | 2         | 2         | 5          |
| Large Community Outside Metro  | 2         | 10        | 1         | 11        | 4         | 28         |
| Small Facilities Outside Metro | 9         | 18        | 5         | 22        | 9         | 63         |
| <b>Column Totals</b>           | <b>18</b> | <b>29</b> | <b>14</b> | <b>35</b> | <b>15</b> | <b>111</b> |

Note: Not all facilities were open during the entire study period.

## Supplement 4: Additional detail on Qualitative Methods

All participants received study information letters and were compensated for their time. Compensation amounts varied by geography and following the protocols of FN partner organizations organizing engagements. In some cases, FN community members received mileage and accommodation support to attend in person gatherings. All participants provided written informed consent. Sharing circles opened with a presentation of the researchers, our interest in the topic, the purposes of the project, individual informed consent and collective First Nations data sovereignty. Descriptive statistics on leaving without completing care and other descriptive statistical results were presented to participants to inform discussion. Our qualitative interview and sharing circles questions focused on exploring differences in emergency care between First Nations and non-First Nations patients.

Interviews were guided by a semi-structured open-ended interview guide. Drawing on previous literature, PM and LB drafted the interview questions and made further refinements based on the comments of the Elder Advisory group and feedback throughout the interview process. The full provider interview guide has been previously published with another paper (see McLane et al., 2022). We provide it and the health director interview guide below. We provide the ppt template that guided our most recent sharing circle as a separate downloadable pdf.

Sharing circle discussion was conducted in rounds, with each round related to a graphic displaying a stage of the ED patient journey created by LB and validated by FN Elder Advisors. Participants took turns in sharing their experiences related to the four-page visual guide that explored participants' decision-making processes in choosing a specific ED; their experiences before, during, leaving, and after ED; as well as interactions with healthcare providers and the health system. In sharing circles, one graphic used to guide discussion focused on leaving the ED and contained the question "If you left the ED before being seen, what made you change your mind to leave?" In practice, questions embedded in the graphic were not discreetly asked and participants did not generally appear to distinguish whether they chose to leave before or after seeing the physician in sharing their experiences of leaving the ED.

Team members bring sociological, emergency medicine and Indigenous research methods to the analysis. LB is a Cree Registered Nurse, Indigenous Researcher and Traditional Practitioner/Knowledge Keeper. She is Executive Director of the Alberta First Nations Information Governance Centre (AFNIGC). PM is a PhD Sociologist and health services researcher of settler background employed by Alberta Health Services (AHS) and conducting independent research as Adjunct Associate Professor of Emergency Medicine, University of Alberta. KF is a Research Associate with expertise in community-based participatory research, Indigenous research methodologies, qualitative methodologies, and knowledge synthesis. LM was project coordinator in emergency medicine at the University of Alberta when contributing to the study and has a background conducting projects for Indigenous organizations. BH is a Blackfoot Registered Nurse with experience in emergency nursing and is Health Director of Blackfoot Confederacy Tribal Council. She was Executive Director of AFNIGC when this project began. TB, AB, EL and KJ are First Nations members and health services employees. CB is a Métis specialist physician and health services researcher with expertise in qualitative and quantitative methods. BRH is senior leader in the health system, Professor of Emergency Medicine, and practices emergency medicine. AC and KR are PhD prepared employees of the Alberta government and of settler background. They contribute quantitative methods and mental health expertise respectively. RJR is a PhD biostatistician of settler background. The majority of the team members have been working together on this project since 2017. Our different professional backgrounds and lived experiences collectively strengthen our analysis, and lend credibility to our findings. Additionally, First Nations partners and Elders co-interpreted and validated the results.

## Supplement 5: Interview/Focus Group Guides

### First Nations Emergency Department Quality of Care Project Health Director Interview/Focus Group Questions

1. Do you feel First Nations patients' expectations for care are met in the emergency department?
2. Do you feel First Nations patients' receive appropriate care in the emergency department?
3. What gaps in communication or care do you see happening when a member of your community is discharged from the ED?
  - Is the health centre involved in the care plan and recovery for members after they leave the ED?
  - Is there any communication between the ED and the health centre when a patient is discharged?
  - What would help members of your community in their recovery when they return home from the ED?
4. We'd like to explore understandings of racism. How do you define racism?
5. Do you think there are times racism impacts patient experiences in the emergency department?
6. What is your definition of reconciliation?
7. What would reconciliation look like in the emergency department?
8. What key factors would define quality of care for First Nations patients in emergency departments?

For this project we analyzed Alberta Health Services data on Emergency Department visits from 2012 to 2017 to compare differences in the numbers and reasons for ED visits between First Nations and non-First Nations people, and to look at some quality of care indicators.

9. We found that First Nations people live further from the ED than non-FN people, and that more FN people arrive by ambulance. Is this consistent with your experience and knowledge, and do you have any thoughts as to the reasons for these findings?
10. We also found that significantly more FN people leave without being seen by a doctor, and more leave before discharge. Is this consistent with your own experience and how might you explain these findings?
11. The data shows that more FN visits are triaged as less acute. Is this consistent with your own experience? Can you explain why this may be?

## **First Nations Emergency Department Quality of Care Project Clinician Interview Questions**

Overall, the interviewer should pick up on themes of history, biases, stereotypes, generalizations, trust, communication, differences in power between patients and providers, distinct roles of physicians and nurses and how these roles impact how they can deliver care for FN patients.

1. Do you feel patients' expectations for care are met in the emergency department? - Prompt for specific examples of why or why not. What do you feel patients' expectations for care are in the ED?

2. Do you feel First Nations patients' expectations for care are met in the emergency department?

- Prompt for specific examples of why or why not, prompt for differences from non-FN patients. Prompt for expectations at different phases such as triage, interview/testing, discharge, follow-up.

3. Do you feel patients receive appropriate care in the emergency department? - Prompt for specific examples of why or why not.

4. Do you feel First Nations patients receive appropriate care in the emergency department? - -Prompt for specific examples of why or why not, prompt for differences from non-FN patients.

-Prompt for expectations at different phases such as triage, interview/testing, discharge, follow-up.

5. When there are multiple care options, are patients part of the decision making about their care in the emergency department? - Prompt for how this works, what kind of things do they get to decide?

6. Are First Nations patients part of the decision making about their emergency department care?

- Prompt for how this works, what kind of things do they get to decide? - Do you feel First Nations patients are invited to participate in decision making to the same degree as other patients?

- Do you perceive any difference in First Nations patients' engagement in decision making?

7. Are patients involved in the decision making about their care plan and recovery after leaving the emergency department?

- Prompt for how this works, what kind of things do they get to decide. How do differences in availability of care options impact after-care decisions?

- If the provider mentions things they to address barriers to follow up care, prompt for specific details.

8. Are First Nations patients involved in the decision making about their care plan and recovery after leaving the emergency department? - Prompt for how this works, what kind of things do they get to decide. How do differences in availability of care options impact after care decisions?

- If the provider mentions things they do to address barriers to follow up care, prompt for specific details.

9. Have you had cultural safety or sensitivity training about Indigenous peoples? - If yes, do you think having this training has benefited your patients?

10. Have you explored cultural differences of those who are different from you?

11. We'd like to explore understandings of racism. How would you define racism?

12. Do you think there are times racism impacts patient experiences in the emergency department?

- Ask for specific examples.

- If the provider mentions stereotypes, ask: What are the stereotypes or pre-expectations around FN patients that you see or hear?

- Have you seen those stereotypes impact how a patient is treated? Can you give an example?

13. What does reconciliation mean to you?

14. What would reconciliation look like in the emergency department?

For this project we analyzed Alberta Health Services data on Emergency Department visits from 2012 to 2017 to compare differences in the numbers and reasons for ED visits between First Nations and non-First Nations people, and to look at some quality of care indicators.

15. We found that First Nations people live further from the ED than non-First Nations people, and that more First Nations people arrive by ambulance. Is this consistent with your experience and knowledge, and do you have any thoughts as to the reasons for these findings?

16. We also found that significantly more FN people leave without being seen by a doctor, and leave more before discharge. Is this consistent with your own experience and how might you explain these findings?

17. The data shows that more FN visits are triaged as less acute. Is this consistent with your own experience? Can you explain why this may be?

**Supplement 6: Characteristics of emergency department visits by First Nations population-membership and LWBS/AMA status**

|                                                      | FN<br>n=1,099,424 (9.4%) |                          |            |                          | Non-FN<br>n=10,586,863 (90.6%) |                          |            |                          |
|------------------------------------------------------|--------------------------|--------------------------|------------|--------------------------|--------------------------------|--------------------------|------------|--------------------------|
|                                                      | Completed Visit          |                          | LWBS/AMA   |                          | Completed Visit                |                          | LWBS/AMA   |                          |
| <b>Sex</b>                                           | n                        | %                        | n          | %                        | n                              | %                        | n          | %                        |
| Male                                                 | 466,904                  | 92.8%                    | 36,269     | 7.2%                     | 5,006,371                      | 96.2%                    | 196,235    | 3.8%                     |
| Female or “other”                                    | 558,290                  | 93.6%                    | 37,961     | 6.4%                     | 5,192,147                      | 96.4%                    | 192,110    | 3.6%                     |
| <b>Age (median, IQR)</b>                             | 30                       | [16.0, 46.0]             | 30         | [20.0, 43.0]             | 36                             | [20.0, 57.0]             | 31         | [20.0, 47.0]             |
| <b>Age</b>                                           |                          |                          |            |                          |                                |                          |            |                          |
| <18 years                                            | 275,953                  | 95.0%                    | 14,534     | 5.0%                     | 2,247,614                      | 96.6%                    | 80,059     | 3.4%                     |
| 18-54 years                                          | 602,532                  | 91.9%                    | 52,975     | 8.1%                     | 5,090,622                      | 95.4%                    | 244,689    | 4.6%                     |
| ≥ 55 years                                           | 146,703                  | 95.6%                    | 6,721      | 4.4%                     | 2,860,253                      | 97.8%                    | 63,591     | 2.2%                     |
| Missing                                              | 6                        |                          | 0          |                          | 29                             |                          | 6          |                          |
| <b>Distance traveled to care, km (median, IQR)</b>   | 7.00                     | [1.00, 24.00]            | 5.00       | [2.00, 19.00]            | 4.00                           | [2.00, 8.00]             | 4.00       | [2.00, 7.00]             |
| ≤5 km                                                | 430,746                  | 93.1%                    | 31,717     | 6.9%                     | 5,310,051                      | 96.4%                    | 199,409    | 3.6%                     |
| >5 km                                                | 555,684                  | 93.8%                    | 36,899     | 6.2%                     | 4,485,386                      | 96.4%                    | 166,389    | 3.6%                     |
| Missing                                              | 38,764                   | 87.3%                    | 5,614      | 12.7%                    | 403,081                        | 94.7%                    | 22,547     | 5.3%                     |
| <b>Income in area of residence, \$ (median, IQR)</b> | \$42,944.0               | [\$29,978.0, \$53,846.0] | \$42,523.0 | [\$29,978.0, \$52,339.0] | \$51,696.0                     | [\$44,223.0, \$62,119.0] | \$51,312.0 | [\$43,159.0, \$61,539.0] |
| <b>Income in area of residence</b>                   |                          |                          |            |                          |                                |                          |            |                          |
| <\$42,000 \$                                         | 422,284                  | 93.1%                    | 31,499     | 6.9%                     | 1,869,704                      | 95.9%                    | 78,973     | 4.1%                     |
| ≥42,000 \$                                           | 572,240                  | 93.9%                    | 37,218     | 6.1%                     | 7,937,692                      | 96.5%                    | 287,317    | 3.5%                     |
| Missing                                              | 30,670                   | 84.8%                    | 5,513      | 15.2%                    | 391,122                        | 94.7%                    | 22,055     | 5.3%                     |
| <b>Comorbidities</b>                                 |                          |                          |            |                          |                                |                          |            |                          |

|                                             |         |       |        |       |           |       |         |      |
|---------------------------------------------|---------|-------|--------|-------|-----------|-------|---------|------|
| None                                        | 691,006 | 93.0% | 51,766 | 7.0%  | 7,273,883 | 96.0% | 305,013 | 4.0% |
| 1 or more                                   | 334,188 | 93.7% | 22,464 | 6.3%  | 2,924,635 | 97.2% | 83,332  | 2.8% |
| Myocardial Infarction                       | 18,756  | 95.0% | 991    | 5.0%  | 212,818   | 97.7% | 4,858   | 2.3% |
| Congestive Heart Failure                    | 20,409  | 96.0% | 858    | 4.0%  | 306,186   | 98.4% | 4,917   | 1.6% |
| Peripheral Vascular Disease                 | 10,881  | 96.2% | 428    | 3.8%  | 146,109   | 98.1% | 2,890   | 1.9% |
| Cerebrovascular Disease                     | 16,651  | 94.6% | 942    | 5.4%  | 243,894   | 97.9% | 5,344   | 2.1% |
| Dementia                                    | 4,341   | 96.3% | 167    | 3.7%  | 121,094   | 98.6% | 1,762   | 1.4% |
| Chronic Pulmonary Disease                   | 163,614 | 94.2% | 10,147 | 5.8%  | 1,121,047 | 96.9% | 35,513  | 3.1% |
| Connective Tissue Disease-Rheumatic Disease | 17,034  | 95.3% | 845    | 4.7%  | 119,144   | 97.6% | 2,965   | 2.4% |
| Peptic Ulcer Disease                        | 22,850  | 93.2% | 1,676  | 6.8%  | 120,780   | 96.8% | 4,032   | 3.2% |
| Mild Liver Disease                          | 25,146  | 88.6% | 3,245  | 11.4% | 94,417    | 94.4% | 5,591   | 5.6% |
| Diabetes without complications              | 72,508  | 93.0% | 5,421  | 7.0%  | 446,067   | 97.1% | 13,207  | 2.9% |
| Diabetes with complications                 | 51,968  | 95.5% | 2,431  | 4.5%  | 427,945   | 97.9% | 9,294   | 2.1% |
| Paraplegia and Hemiplegia                   | 6,463   | 94.1% | 405    | 5.9%  | 54,742    | 97.5% | 1,431   | 2.5% |
| Renal Disease                               | 19,604  | 95.0% | 1,039  | 5.0%  | 204,971   | 98.0% | 4,152   | 2.0% |
| Cancer                                      | 18,524  | 95.6% | 859    | 4.4%  | 348,164   | 98.0% | 7,235   | 2.0% |
| Moderate or Severe Liver Disease            | 11,579  | 92.1% | 997    | 7.9%  | 43,035    | 96.0% | 1,799   | 4.0% |
| Metastatic Carcinoma                        | 6,067   | 96.2% | 238    | 3.8%  | 118,638   | 98.4% | 1,888   | 1.6% |
| AIDS/HIV                                    | 6,022   | 86.9% | 910    | 13.1% | 7,826     | 91.2% | 755     | 8.8% |



|                                                           |         |       |        |       |           |       |         |      |
|-----------------------------------------------------------|---------|-------|--------|-------|-----------|-------|---------|------|
| <b>Ambulance arrival</b>                                  |         |       |        |       |           |       |         |      |
| Yes ambulance                                             | 161,239 | 93.0% | 12,225 | 7.0%  | 1,037,035 | 97.3% | 29,249  | 2.7% |
| No ambulance                                              | 863,955 | 93.3% | 62,005 | 6.7%  | 9,161,483 | 96.2% | 359,096 | 3.8% |
| <b>Triage</b>                                             |         |       |        |       |           |       |         |      |
| CTAS 1-2                                                  | 87,665  | 95.9% | 3,774  | 4.1%  | 1,228,191 | 97.9% | 25,767  | 2.1% |
| CTAS 3                                                    | 284,838 | 92.9% | 21,643 | 7.1%  | 3,505,710 | 96.1% | 143,975 | 3.9% |
| CTAS 4-5                                                  | 607,841 | 93.8% | 40,503 | 6.2%  | 5,139,459 | 96.3% | 196,369 | 3.7% |
| CTAS missing                                              | 4,4850  | 84.4% | 8,310  | 15.6% | 325,158   | 93.6% | 22,234  | 6.4% |
| <b>Time</b>                                               |         |       |        |       |           |       |         |      |
| Day                                                       | 457,841 | 93.7% | 30,895 | 6.3%  | 5,158,864 | 97.0% | 161,952 | 3.0% |
| Evening                                                   | 447,475 | 93.3% | 32,056 | 6.7%  | 3,855,625 | 95.7% | 173,450 | 4.3% |
| Night                                                     | 119,878 | 91.4% | 11,279 | 8.6%  | 1,184,029 | 95.7% | 52,943  | 4.3% |
| <b>Facility type</b>                                      |         |       |        |       |           |       |         |      |
| Tertiary Mixed                                            | 108,849 | 87.6% | 15,372 | 12.4% | 1,518,824 | 95.0% | 79,370  | 5.0% |
| Regional                                                  | 167,298 | 91.4% | 15,757 | 8.6%  | 1,250,357 | 95.3% | 61,004  | 4.7% |
| Large Community                                           | 337,372 | 94.5% | 19,775 | 5.5%  | 2,075,795 | 97.3% | 56,806  | 2.7% |
| Medium Community                                          | 216,223 | 95.3% | 10,674 | 4.7%  | 1,396,732 | 97.2% | 40,717  | 2.8% |
| Small Community                                           | 125,134 | 95.0% | 6,569  | 5.0%  | 789,551   | 98.1% | 15,040  | 1.9% |
| UCC                                                       | 32,605  | 90.7% | 3,357  | 9.3%  | 911,732   | 96.3% | 34,545  | 3.7% |
| Ambulatory                                                | 37,713  | 93.3% | 2,726  | 6.7%  | 493,219   | 95.7% | 22,055  | 4.3% |
| <b>Zone</b>                                               |         |       |        |       |           |       |         |      |
| North                                                     | 481,649 | 94.4% | 28,341 | 5.6%  | 838,139   | 97.2% | 24,276  | 2.8% |
| Edmonton                                                  | 154,935 | 88.8% | 19,580 | 11.2% | 3,000,347 | 96.6% | 106,243 | 3.4% |
| Central                                                   | 147,164 | 93.8% | 9,760  | 6.2%  | 1,593,857 | 97.2% | 45,282  | 2.8% |
| Calgary                                                   | 133,606 | 93.2% | 9,771  | 6.8%  | 3,000,347 | 96.6% | 106,243 | 3.4% |
| South                                                     | 101,909 | 94.1% | 6,368  | 5.9%  | 838,139   | 97.2% | 24,276  | 2.8% |
| Missing                                                   | 5,931   | 93.5% | 410    | 6.5%  | 314436    | 96.1% | 12717   | 3.9% |
| <b>Facility/geography combination as used in analysis</b> |         |       |        |       |           |       |         |      |

|                              |         |       |        |       |           |       |         |      |
|------------------------------|---------|-------|--------|-------|-----------|-------|---------|------|
| Large Metro                  | 188,046 | 89.1% | 22,987 | 10.9% | 3,281,132 | 95.4% | 158,178 | 4.6% |
| Small Metro                  | 38,475  | 89.4% | 4,577  | 10.6% | 717,936   | 95.4% | 34,294  | 4.6% |
| Regional Outside Metro       | 88,101  | 91.5% | 8,142  | 8.5%  | 1,250,357 | 95.4% | 61,004  | 4.7% |
| Large Community              | 337,372 | 94.5% | 19,775 | 5.5%  | 2,075,795 | 97.3% | 56,806  | 2.7% |
| Small Facility Outside Metro | 373,200 | 95.2% | 18,749 | 4.8%  | 2,873,298 | 97.4% | 78,063  | 2.6% |

**Supplement 7: Characteristics of patients and emergency department visits by First Nations population-membership and LWBS status**

|                                                      | FN<br>n=1,099,424 (9.4%) |                  |        |                  | Non-FN<br>n=10,586,863 (90.6%) |                  |         |                  |
|------------------------------------------------------|--------------------------|------------------|--------|------------------|--------------------------------|------------------|---------|------------------|
|                                                      | Visits other than LWBS   |                  | LWBS   |                  | Visits Other than LWBS         |                  | LWBS    |                  |
| <b>Sex</b>                                           | n                        | %                | n      | %                | n                              | %                | n       | %                |
| Male                                                 | 479,332                  | 95.3%            | 23,841 | 4.7%             | 5,056,281                      | 97.2%            | 146,325 | 2.8%             |
| Female or “other”                                    | 571,402                  | 95.8%            | 24,849 | 4.2%             | 5,240,114                      | 97.3%            | 144,143 | 2.7%             |
| <b>Age (median, IQR)</b>                             | 30                       | (16, 46)         | 30     | (20, 43)         | 36                             | (20, 57)         | 30      | (19, 46)         |
| <b>Age</b>                                           |                          |                  |        |                  |                                |                  |         |                  |
| <18 years                                            | 280848                   | 96.7%            | 9,639  | 3.3%             | 2,262,961                      | 97.2%            | 64,712  | 2.8%             |
| 18-54 years                                          | 620504                   | 94.7%            | 35,003 | 5.3%             | 5,153,814                      | 96.6%            | 181,497 | 3.4%             |
| ≥ 55 years                                           | 149376                   | 97.4%            | 4,048  | 2.6%             | 2,879,591                      | 98.5%            | 44,253  | 1.5%             |
| Missing                                              | 6                        |                  | 0      |                  | 29                             |                  | 6       |                  |
| <b>Distance traveled to care, km (median, IQR)</b>   | 7                        | (1, 24)          | 5      | (2, 19)          | 4                              | (2, 8)           | 4       | (2, 7)           |
| ≤5 km                                                | 440,981                  | 95.4%            | 21,482 | 4.6%             | 5,364,536                      | 97.4             | 144,924 | 2.6%             |
| >5 km                                                | 569,906                  | 96.2%            | 22,677 | 3.8%             | 4,522,889                      | 97.2%            | 128,886 | 2.8%             |
| Missing                                              | 39,847                   | 89.8%            | 4,531  | 10.2%            | 408,970                        | 96.1%            | 16,658  | 3.9%             |
| <b>Income in area of residence, \$ (median, IQR)</b> | 42,944                   | (29,978, 53,833) | 42,850 | (33,120, 52,445) | 51,686                         | (44,220, 62,098) | 51,612  | (43,035, 62,444) |
| <b>Income in area of residence</b>                   |                          |                  |        |                  |                                |                  |         |                  |

|                                             |         |       |        |       |           |       |         |      |
|---------------------------------------------|---------|-------|--------|-------|-----------|-------|---------|------|
| <\$42,000 \$                                | 584,540 | 95.9% | 24,918 | 4.1%  | 8,010,392 | 97.4% | 214,617 | 2.6% |
| ≥42,000 \$                                  | 434,469 | 95.7% | 19,314 | 4.3%  | 1,889,181 | 96.9% | 59,496  | 3.1% |
| Missing                                     | 31,725  | 87.7% | 4458   | 12.3% | 396,822   | 96.0% | 16,355  | 4.0% |
| <b>Comorbidities</b>                        |         |       |        |       |           |       |         |      |
| None                                        | 708,562 | 95.4% | 34,210 | 4.6%  | 7,345,837 | 96.9% | 233,059 | 3.1% |
| 1 or more                                   | 342,172 | 95.9% | 14,480 | 4.1%  | 2,950,558 | 98.1% | 57,409  | 1.9% |
| <b>Comorbidities (categorical)</b>          |         |       |        |       |           |       |         |      |
| AIDS/HIV                                    | 6,022   | 86.9% | 910    | 13.1% | 7,826     | 91.2% | 755     | 8.8% |
| Cancer                                      | 18,524  | 95.6% | 859    | 4.4%  | 348,164   | 98.0% | 7,235   | 2.0% |
| Cerebrovascular Disease                     | 16,651  | 94.6% | 942    | 5.4%  | 243,894   | 97.9% | 5,344   | 2.1% |
| Chronic Pulmonary Disease                   | 163,614 | 94.2% | 10,147 | 5.8%  | 1,121,047 | 96.9% | 35,513  | 3.1% |
| Congestive Heart Failure                    | 20,409  | 96.0% | 858    | 4.0%  | 306,186   | 98.4% | 4,917   | 1.6% |
| Connective Tissue Disease-Rheumatic Disease | 17,034  | 95.3% | 845    | 4.7%  | 119,144   | 97.6% | 2,965   | 2.4% |
| Dementia                                    | 4,341   | 96.3% | 167    | 3.7%  | 121,094   | 98.6% | 1,762   | 1.4% |
| Diabetes with complications                 | 51,968  | 95.5% | 2,431  | 4.5%  | 427,945   | 97.9% | 9,294   | 2.1% |
| Diabetes without complications              | 72,508  | 93.0% | 5,421  | 7.0%  | 446,067   | 97.1% | 13,207  | 2.9% |
| Metastatic Carcinoma                        | 6,067   | 96.2% | 238    | 3.8%  | 118,638   | 98.4% | 1,888   | 1.6% |
| Mild Liver Disease                          | 25,146  | 88.6% | 3,245  | 11.4% | 94,417    | 94.4% | 5,591   | 5.6% |
| Moderate or Severe Liver Disease            | 11,579  | 92.1% | 997    | 7.9%  | 43,035    | 96.0% | 1,799   | 4.0% |
| Myocardial Infarction                       | 18,756  | 95.0% | 991    | 5.0%  | 212,818   | 97.7% | 4,858   | 2.3% |
| Paraplegia and Hemiplegia                   | 6,463   | 94.1% | 405    | 5.9%  | 54,742    | 97.5% | 1,431   | 2.5% |
| Peptic Ulcer Disease                        | 22,850  | 93.2% | 1,676  | 6.8%  | 120,780   | 96.8% | 4,032   | 3.2% |

|                             |         |       |        |       |           |       |         |      |
|-----------------------------|---------|-------|--------|-------|-----------|-------|---------|------|
| Peripheral Vascular Disease | 10,881  | 96.2% | 428    | 3.8%  | 146,109   | 98.1% | 2,890   | 1.9% |
| Renal Disease               | 19,604  | 95.0% | 1,039  | 5.0%  | 204,971   | 98.0% | 4,152   | 2.0% |
| <b>Ambulance arrival</b>    |         |       |        |       |           |       |         |      |
| Yes ambulance               | 166,327 | 95.9% | 7137   | 4.1%  | 1,047,033 | 98.2% | 19,251  | 1.8% |
| No ambulance                | 884,407 | 94.5% | 41,553 | 4.5%  | 9,249,362 | 97.1% | 271,217 | 2.9% |
| <b>Triage</b>               |         |       |        |       |           |       |         |      |
| CTAS 1-2                    | 89,508  | 97.9% | 1,931  | 2.1%  | 1238321   | 98.8% | 15,637  | 1.2% |
| CTAS 3                      | 291,690 | 95.2% | 14,791 | 4.8%  | 3,538,627 | 97.0% | 111,058 | 3.0% |
| CTAS 4-5                    | 623,286 | 96.1% | 25,058 | 3.9%  | 5,189,459 | 97.3% | 146,369 | 2.7% |
| CTAS missing                | 46,250  | 87.0% | 6,910  | 13.0% | 329,988   | 95.0% | 17,404  | 5.0% |
| <b>Time</b>                 |         |       |        |       |           |       |         |      |
| Day                         | 469,459 | 96.1% | 19,277 | 3.9%  | 5,206,332 | 97.8% | 114,484 | 2.2% |
| Evening                     | 457,296 | 95.4% | 22,235 | 4.6%  | 3,892,196 | 96.6% | 136,879 | 3.4% |
| Night                       | 123,979 | 94.5% | 7,178  | 5.5%  | 1,197,867 | 96.8% | 39,105  | 3.2% |
| <b>Facility type</b>        |         |       |        |       |           |       |         |      |
| Tertiary Mixed              | 111,916 | 90.1% | 12,305 | 9.9%  | 1,533,940 | 96.0% | 64,254  | 4.0% |
| Regional                    | 171,116 | 93.5% | 11,939 | 6.5%  | 3,041,859 | 96.5% | 110,618 | 3.5% |
| Large Community             | 346,958 | 97.1% | 10,189 | 2.9%  | 2,102,910 | 98.6% | 29,691  | 1.4% |
| Medium Community            | 220,361 | 97.1% | 6,536  | 2.9%  | 1,409,665 | 98.1% | 27,784  | 1.9% |
| Small Community             | 129,043 | 98.0% | 2,660  | 2.0%  | 796,578   | 99.0% | 8,013   | 1.0% |
| UCC                         | 32,917  | 91.5% | 3,045  | 8.5%  | 914,411   | 96.6% | 31,866  | 3.4% |
| Ambulatory                  | 38,423  | 95.0% | 2,016  | 5.0%  | 497,032   | 96.5% | 18,242  | 3.5% |
| <b>Zone</b>                 |         |       |        |       |           |       |         |      |
| North                       | 491,865 | 96.4% | 18,125 | 3.6%  | 2,151,849 | 98.0% | 43,905  | 2.0% |
| Edmonton                    | 159,404 | 91.3% | 15,111 | 8.7%  | 2,350,795 | 95.7% | 105,017 | 4.3% |
| Central                     | 152,987 | 97.5% | 3,937  | 2.5%  | 1,613,381 | 98.4% | 25,758  | 1.6% |
| Calgary                     | 135,438 | 94.5% | 7,939  | 5.5%  | 3,016,581 | 97.1% | 90,009  | 2.9% |
| South                       | 104,983 | 97.0% | 3,294  | 3.0%  | 845,642   | 98.1% | 16,773  | 1.9% |
| Missing                     | 6,057   | 95.5% | 284    | 4.5%  | 318,147   | 97.2% | 9,006   | 2.8% |

| <b>Facility/geography combination as used in analysis</b> |         |       |        |      |           |       |         |      |
|-----------------------------------------------------------|---------|-------|--------|------|-----------|-------|---------|------|
| Large Metro                                               | 193,086 | 91.5% | 17,947 | 8.5% | 3,314,061 | 96.4% | 125,249 | 3.6% |
| Small Metro                                               | 39,095  | 90.8% | 3,957  | 9.2% | 721,838   | 96.0% | 30,392  | 4.0% |
| Regional Outside Metro                                    | 89,946  | 93.5% | 6,297  | 6.5% | 1,261,738 | 96.2% | 49,623  | 3.8% |
| Large Community                                           | 346,958 | 97.1% | 10,189 | 2.9% | 2,102,910 | 98.6% | 29,691  | 1.4% |
| Small Facility Outside Metro                              | 381,649 | 97.4% | 10,300 | 2.6% | 2,895,848 | 98.1% | 55,513  | 1.9% |

**Supplement 8: Characteristics of patients and emergency department visits by First Nations population-membership and AMA status**

|                                                      | FN<br>n=1,099,424 (9.4%) |                  |        |                  | Non-FN<br>n=10,586,863 (90.6%) |                  |        |                  |
|------------------------------------------------------|--------------------------|------------------|--------|------------------|--------------------------------|------------------|--------|------------------|
|                                                      | Visits other than AMA    |                  | AMA    |                  | Visits other than AMA          |                  | AMA    |                  |
| <b>Sex</b>                                           | n                        | %                | n      | %                | n                              | %                | n      | %                |
| Male                                                 | 490,745                  | 97.5%            | 12,428 | 2.5%             | 5,152,696                      | 99.0%            | 49,910 | 1.0%             |
| Female or “other”                                    | 583,139                  | 97.8%            | 13,112 | 2.2%             | 5,336,290                      | 99.1%            | 47,967 | 0.9%             |
| <b>Age (median, IQR)</b>                             | 30                       | (16, 46)         | 30     | (20, 44)         | 36                             | (20, 57)         | 34     | (22, 51)         |
| <b>Age</b>                                           |                          |                  |        |                  |                                |                  |        |                  |
| <18 years                                            | 285,592                  | 98.3%            | 4,895  | 1.7%             | 2,312,326                      | 99.3%            | 15,347 | 0.7%             |
| 18-54 years                                          | 637,535                  | 97.3%            | 17,972 | 2.7%             | 5,272,119                      | 98.8%            | 63,192 | 1.2%             |
| ≥ 55 years                                           | 150,751                  | 98.3%            | 2,673  | 1.7%             | 2,904,506                      | 99.3%            | 19,338 | 0.7%             |
| Missing                                              | 6                        |                  | 0      |                  | 35                             |                  | 0      |                  |
| <b>Distance traveled to care, km (median, IQR)</b>   | 6                        | (1, 24)          | 8      | (2, 19)          | 4                              | (2, 8)           | 3      | (2, 7)           |
| ≤5 km                                                | 452,228                  | 97.8%            | 10,235 | 2.2%             | 5,454,975                      | 99.0%            | 54,485 | 1.0%             |
| >5 km                                                | 578,361                  | 97.6%            | 14,222 | 2.4%             | 4,614,272                      | 99.2%            | 37,503 | 0.8%             |
| Missing                                              | 43,295                   | 97.6%            | 1,083  | 2.4%             | 419,739                        | 98.6%            | 5,889  | 1.4%             |
| <b>Income in area of residence, \$ (median, IQR)</b> | 42,944                   | (29,978, 53,833) | 42,021 | (22,990, 51,107) | 51,691                         | (44,184, 62,119) | 50,476 | (43,442, 59,188) |
| <b>Income in area of residence</b>                   |                          |                  |        |                  |                                |                  |        |                  |
| <\$42,000 \$                                         | 441,598                  | 97.3%            | 12,185 | 2.7%             | 1,929,200                      | 99.0%            | 19,477 | 1.0%             |
| ≥42,000 \$                                           | 597,158                  | 98.0%            | 12,300 | 2.0%             | 8,152,309                      | 99.1%            | 72,700 | 0.9%             |

|                                             |         |       |        |      |           |       |        |      |
|---------------------------------------------|---------|-------|--------|------|-----------|-------|--------|------|
| Missing                                     | 35,128  | 97.1% | 1,055  | 2.9% | 407,477   | 98.6% | 5,700  | 1.4% |
| <b>Comorbidities</b>                        |         |       |        |      |           |       |        |      |
| None                                        | 725,216 | 97.6% | 17,556 | 2.4% | 7,506,942 | 99.1% | 71,954 | 0.9% |
| 1 or more                                   | 348,668 | 97.8% | 7,984  | 2.2% | 2,982,044 | 99.1% | 25,923 | 0.9% |
| <b>Comorbidities (categorical)</b>          |         |       |        |      |           |       |        |      |
| AIDS/HIV                                    | 6,289   | 90.7% | 643    | 9.3% | 8,049     | 93.8% | 532    | 6.2% |
| Cancer                                      | 18,850  | 97.3% | 533    | 2.7% | 350,525   | 98.6% | 4,874  | 1.4% |
| Cerebrovascular Disease                     | 16,986  | 96.5% | 607    | 3.5% | 245,678   | 98.6% | 3,560  | 1.4% |
| Chronic Pulmonary Disease                   | 167,281 | 96.3% | 6480   | 3.7% | 1,132,041 | 97.9% | 24,519 | 2.1% |
| Congestive Heart Failure                    | 20,800  | 97.8% | 467    | 2.2% | 307,977   | 99.0% | 3,126  | 1.0% |
| Connective Tissue Disease-Rheumatic Disease | 17,358  | 97.1% | 521    | 2.9% | 120,110   | 98.4% | 1,999  | 1.6% |
| Dementia                                    | 4,420   | 98.0% | 88     | 2.0% | 121,632   | 99.0% | 1,224  | 1.0% |
| Diabetes with complications                 | 52,941  | 97.3% | 1458   | 2.7% | 431,215   | 98.6% | 6,024  | 1.4% |
| Diabetes without complications              | 74,348  | 95.4% | 3581   | 4.6% | 450,071   | 98.0% | 9,203  | 2.0% |
| Metastatic Carcinoma                        | 6,154   | 97.6% | 151    | 2.4% | 119,239   | 98.9% | 1,287  | 1.1% |
| Mild Liver Disease                          | 26,112  | 92.0% | 2279   | 8.0% | 96,078    | 96.1% | 3,930  | 3.9% |
| Moderate or Severe Liver Disease            | 11,969  | 95.2% | 607    | 4.8% | 43,621    | 97.3% | 1,213  | 2.7% |
| Myocardial Infarction                       | 19,226  | 97.4% | 521    | 2.6% | 214,648   | 98.6% | 3028   | 1.4% |
| Paraplegia and Hemiplegia                   | 6,583   | 95.9% | 285    | 4.1% | 55,171    | 98.2% | 1,002  | 1.8% |
| Peptic Ulcer Disease                        | 23,498  | 95.8% | 1028   | 4.2% | 122,106   | 97.8% | 2,706  | 2.2% |



|                             |         |       |        |      |           |       |        |       |
|-----------------------------|---------|-------|--------|------|-----------|-------|--------|-------|
| Peripheral Vascular Disease | 11,068  | 97.9% | 241    | 2.1% | 147,069   | 98.7% | 1,930  | 1.3%  |
| Renal Disease               | 20,047  | 97.1% | 596    | 2.9% | 206,403   | 98.7% | 2,720  | 1.3%  |
| <b>Ambulance arrival</b>    |         |       |        |      |           |       |        |       |
| Yes ambulance               | 168,376 | 97.1% | 5,088  | 2.9% | 1,056,286 | 99.1% | 9,998  | 0.9%  |
| No ambulance                | 905,508 | 97.8% | 20,452 | 2.2% | 9,432,700 | 99.1% | 87,879 | 0.9 % |
| <b>Triage</b>               |         |       |        |      |           |       |        |       |
| CTAS 1-2                    | 89,596  | 98%   | 1843   | 2.0% | 1,243,828 | 99.2% | 10,130 | 0.80% |
| CTAS 3                      | 299,629 | 97.8% | 6,852  | 2.2% | 3,616,768 | 99.1% | 32,917 | 0.90% |
| CTAS 4-5                    | 632,899 | 97.6% | 15,445 | 2.4% | 5,285,828 | 99.1% | 50,000 | 0.90% |
| CTAS missing                | 51,760  | 97.4% | 1,400  | 2.6% | 342,562   | 98.6% | 4,830  | 1.40% |
| <b>Time</b>                 |         |       |        |      |           |       |        |       |
| Day                         | 477,118 | 97.6% | 11,618 | 2.4% | 5,273,348 | 99.1% | 47,468 | 0.9%  |
| Evening                     | 469,710 | 98.0% | 9,821  | 2.0% | 3,992,504 | 99.1% | 36,571 | 0.9%  |
| Night                       | 127,056 | 96.9% | 4,101  | 3.1% | 1,223,134 | 98.9% | 13,838 | 1.1%  |
| <b>Facility type</b>        |         |       |        |      |           |       |        |       |
| Tertiary Mixed              | 121,154 | 97.5% | 3,067  | 2.5% | 1,583,078 | 99.1% | 15,116 | 0.9%  |
| Regional                    | 179,237 | 97.9% | 3,818  | 2.1% | 3,123,283 | 99.1% | 29,194 | 0.9%  |
| Large Community             | 347,561 | 97.3% | 9,586  | 2.7% | 2,105,486 | 98.7% | 27,115 | 1.3%  |
| Medium Community            | 222,759 | 98.2% | 4,138  | 1.8% | 1,424,516 | 99.1% | 12,933 | 0.9%  |
| Small Community             | 127,794 | 97.0% | 3,909  | 3.0% | 797,564   | 99.1% | 7,027  | 0.9%  |
| UCC                         | 35,650  | 90.7% | 312    | 9.3% | 943,598   | 99.7% | 2,679  | 0.3%  |
| Ambulatory                  | 39,729  | 98.2% | 710    | 1.8% | 511,461   | 99.3% | 3,813  | 0.7%  |
| <b>Zone</b>                 |         |       |        |      |           |       |        |       |
| North                       | 499,774 | 98.0% | 10,216 | 2.0% | 2,173,023 | 99.0% | 22,731 | 1.0%  |
| Edmonton                    | 170,046 | 97.4% | 4,469  | 2.6% | 2,427,638 | 98.9% | 28,174 | 1.1%  |
| Central                     | 151,101 | 96.3% | 5,823  | 3.7% | 1,619,615 | 98.8% | 19,524 | 1.2%  |
| Calgary                     | 141,545 | 98.7% | 1,832  | 1.3% | 3,090,356 | 99.5% | 16,234 | 0.5%  |
| South                       | 105,203 | 97.2% | 3,074  | 2.8% | 854,912   | 99.1% | 7,503  | 0.9%  |
| Missing                     | 6,215   | 98.0% | 126    | 2.0% | 323,442   | 96.1% | 3,711  | 3.9%  |

| <b>Facility/geography combination as used in analysis</b> |         |       |       |      |           |       |        |      |
|-----------------------------------------------------------|---------|-------|-------|------|-----------|-------|--------|------|
| Large Metro                                               | 205,993 | 97.6% | 5,040 | 2.4% | 3,406,381 | 99.0% | 32,929 | 1.0% |
| Small Metro                                               | 42,432  | 98.6% | 620   | 1.4% | 748,328   | 99.5% | 3,902  | 0.5% |
| Regional Outside Metro                                    | 94,398  | 98.1% | 1,845 | 1.9% | 1,299,980 | 99.1% | 11,381 | 0.9% |
| Large Community                                           | 347,561 | 97.3% | 9,586 | 2.7% | 2,105,486 | 98.7% | 27,115 | 1.3% |
| Small Facility Outside Metro                              | 383,500 | 97.8% | 8,449 | 2.2% | 2,928,811 | 99.2% | 22,550 | 0.8% |

**Supplement 9: Proportion of patients LWBS/AMA by FN population-membership for each disease category and condition model**

|                                          | FN              |       |          |       | Non FN          |       |          |      |
|------------------------------------------|-----------------|-------|----------|-------|-----------------|-------|----------|------|
|                                          | Completed visit |       | LWBS/AMA |       | Completed visit |       | LWBS/AMA |      |
|                                          | n               | %     | n        | %     | n               | %     | n        | %    |
| <b>Episode Disease Category</b>          |                 |       |          |       |                 |       |          |      |
| Trauma and Injury                        | 175,365         | 94.0% | 11,197   | 6.0%  | 1,995,125       | 97.2% | 58,574   | 2.9% |
| Infection                                | 198,438         | 97.7% | 4,607    | 2.3%  | 1,626,454       | 98.4% | 26,166   | 1.6% |
| Obstetrics & Gynecology                  | 37,088          | 95.5% | 1,769    | 4.6%  | 290,178         | 96.9% | 9,441    | 3.2% |
| Mental Health                            | 29,885          | 93.6% | 2,053    | 6.4%  | 235,055         | 95.9% | 10,175   | 4.2% |
| Substance Use                            | 39,096          | 89.1% | 4,799    | 10.9% | 88,907          | 91.0% | 8,775    | 9.0% |
| <b>Conditions</b>                        |                 |       |          |       |                 |       |          |      |
| Long Bone Fracture, unspecified          | 12,925          | 99.1% | 124      | 1.0%  | 163,113         | 99.8% | 416      | 0.3% |
| Acute Respiratory Infection, Unspecified | 40,981          | 99.6% | 179      | 0.4%  | 284,008         | 99.8% | 685      | 0.2% |
| Spontaneous Abortion                     | 6,649           | 97.6% | 166      | 2.4%  | 67,885          | 98.9% | 754      | 1.1% |
| Anxiety disorder, unspecified            | 9,268           | 91.6% | 850      | 8.4%  | 52,931          | 94.6% | 3,053    | 5.5% |
| Opioid Related Visit                     | 2,560           | 91.8% | 229      | 8.2%  | 12,777          | 92.3% | 1,064    | 7.7% |

**Supplement 10: Proportion of patients LWBS by FN population-membership for each disease category and condition model**

|                                          | FN                     |       |       |      | Non FN                 |       |        |      |
|------------------------------------------|------------------------|-------|-------|------|------------------------|-------|--------|------|
|                                          | Visits other than LWBS |       | LWBS  |      | Visits other than LWBS |       | LWBS   |      |
|                                          | n                      | %     | n     | %    | n                      | %     | n      | %    |
| <b>Episode Disease Category</b>          |                        |       |       |      |                        |       |        |      |
| Trauma and Injury                        | 179,302                | 96.1% | 7,260 | 3.9% | 2,008,555              | 97.8% | 45,117 | 2.2% |
| Infection                                | 200,331                | 98.7% | 2,714 | 1.3% | 1,633,132              | 98.8% | 19,488 | 1.2% |
| Obstetrics & Gynecology                  | 37,770                 | 97.2% | 1,087 | 2.8% | 292,765                | 97.7% | 6,854  | 2.3% |
| Mental Health                            | 30,694                 | 96.1% | 1,244 | 3.9% | 238,428                | 97.2% | 6,802  | 2.8% |
| Substance Use                            | 41,184                 | 93.8% | 2,711 | 6.2% | 92,256                 | 94.4% | 5,426  | 5.6% |
| <b>Conditions</b>                        |                        |       |       |      |                        |       |        |      |
| Long Bone Fracture, unspecified          | 13,022                 | 99.8% | 27    | 0.2% | 163,405                | 99.9% | 124    | 0.1% |
| Acute Respiratory Infection, Unspecified | 41,121                 | 99.9% | 39    | 0.1% | 284,472                | 99.9% | 221    | 0.1% |
| Spontaneous Abortion                     | 6,753                  | 99.1% | 62    | 0.9% | 68,240                 | 99.5% | 369    | 0.5% |
| Anxiety disorder, unspecified            | 9,574                  | 94.6% | 544   | 5.4% | 53,730                 | 96.0% | 2,254  | 4.0% |
| Opioid Related Visit                     | 2,704                  | 97.0% | 85    | 3.1% | 13,315                 | 96.2% | 526    | 3.8% |

**Supplement 11: Proportion of patients LAMA by FN population-membership for each disease category and condition model**

|                                          | FN                    |       |       |      | Non-FN                |       |       |      |
|------------------------------------------|-----------------------|-------|-------|------|-----------------------|-------|-------|------|
|                                          | Visits other than AMA |       | AMA   |      | Visits other than AMA |       | AMA   |      |
|                                          | n                     | %     | n     | %    | n                     | %     | n     | %    |
| <b>Episode Disease Category</b>          |                       |       |       |      |                       |       |       |      |
| Trauma and Injury                        | 182,625               | 97.9% | 3,937 | 2.1% | 2,040,242             | 99.3% | 13430 | 0.7% |
| Infection                                | 201,152               | 99.1% | 1,893 | 0.9% | 1,645,942             | 99.6% | 6678  | 0.4% |
| Obstetrics & Gynecology                  | 38,175                | 98.2% | 682   | 1.8% | 297,032               | 99.1% | 2587  | 0.9% |
| Mental Health                            | 31,129                | 97.5% | 809   | 2.5% | 241,857               | 98.6% | 3373  | 1.4% |
| Substance Use                            | 41,807                | 95.2% | 2,088 | 4.8% | 94,333                | 96.6% | 3349  | 3.4% |
| <b>Conditions</b>                        |                       |       |       |      |                       |       |       |      |
| Long Bone Fracture, unspecified          | 12,952                | 99.3% | 97    | 0.7% | 163,237               | 99.8% | 292   | 0.2% |
| Acute Respiratory Infection, Unspecified | 41,020                | 99.7% | 140   | 0.3% | 284,229               | 99.8% | 464   | 0.2% |
| Spontaneous Abortion                     | 6,711                 | 98.5% | 104   | 1.5% | 68,224                | 99.4% | 385   | 0.6% |
| Anxiety disorder, unspecified            | 9,812                 | 97.0% | 306   | 3.0% | 55,185                | 98.6% | 799   | 1.4% |
| Opioid Related Visit                     | 2,645                 | 94.8% | 144   | 5.2% | 13,303                | 96.1% | 538   | 3.9% |
